# Supplementary material
Source: publisher figshare collection journal article supplement (https://gsapubs.figshare.com/articles/dataset/_/24291358)
Supplement: Supplementary file 1 [file 2]

Qingqing Fan, Dadong Liu, Wei Du, Yiming Li, Feng Liang, Fuping Zhao, Xia Feng, Yi Chen, Ziya Zhang, Yuxiang Zhang and Chen Zhang, 2023, In situ U-Pb dating of carbonate veins in Cambrian shales constrains fluid flow and hydrocarbon evolution at the southeastern margin of the Upper Yangtze platform, southwestern China: GSA Bulletin, <https://doi.org/10.1130/B36893.1>.

## Supplemental Material

**Table S1.** Carbonate LA-ICP-MS U-Pb isotope data.

**Table S2.** LA-ICP-MS rare earth element (REE) data of carbonate veins.

**Table S3.** Carbon and oxygen isotope data of carbonate veins.

TABLE S3. CARBON AND OXYGEN ISOTOPIC COMPOSITIONS OF CARBONATE VEINS

| Samples         | $\delta^{13}\text{C}_{\text{PDB}}$ (‰) | $\delta^{18}\text{O}_{\text{PDB}}$ (‰) | $\delta^{18}\text{O}_{\text{SMOW}}$ (‰) |
|-----------------|----------------------------------------|----------------------------------------|-----------------------------------------|
| Fibrous calcite | 0.58                                   | -9.66                                  | 17.61                                   |
| Barytocalcite   | 1.48                                   | -10.65                                 | 18.94                                   |
| Calcite I       | -1.82                                  | -11.56                                 | 21.15                                   |
| Calcite I       | -2.36                                  | -12.06                                 | 21.92                                   |
| Calcite II      | -2.02                                  | -9.79                                  | 18.83                                   |
| Calcite III     | -6.74                                  | -8.42                                  | 22.24                                   |
